# Supplementary material for: Electrospun heparin-loaded nano-fiber sutures for the amelioration of achilles tendon rupture regeneration: in vivo evaluation
Source: Royal Society of Chemistry journal article supplement (doi:10.1039/d1tb00162k), 2021-01-01
Supplement: d1tb00162k1.pdf [file d1tb00162k1.pdf]

*Collagen content of tendon assay:* Hydroxyproline method was used to measure the collagen content of tendon, a standard curve must first be formulated, as shown in Fig. 1, and the regression equation is obtained:  $Y=0.018 X+0.0036$  ( $R^2=0.9994$ ) (Y: OD value, X: collagen concentration( $\mu\text{g/mL}$ )). The collagen content equal to collagen concentration multiply by volume divide by fresh weight of tendon.

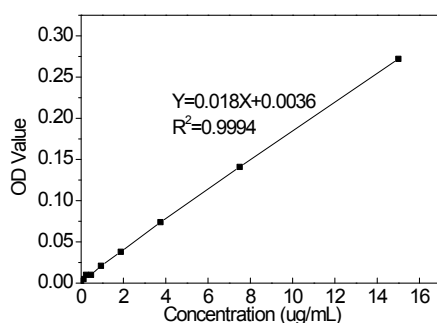

Table  
 S-1 Grading  
 criteria of  
 adhesions in

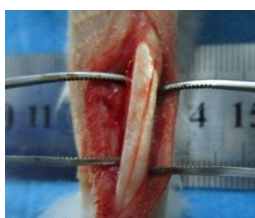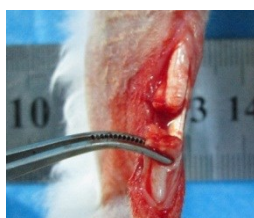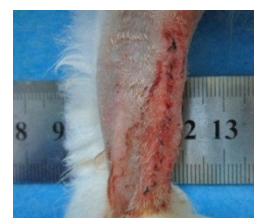

macroscopic evaluation

| <i>Points</i> | <i>Features of adhesions</i> |
|---------------|------------------------------|
| 0             | No apparent adhesion         |
| 2             | Slight adhesions (< 33%)     |
| 3-4           | Moderate adhesions (33%-66%) |
| 5-6           | Severe adhesions (> 66%)     |

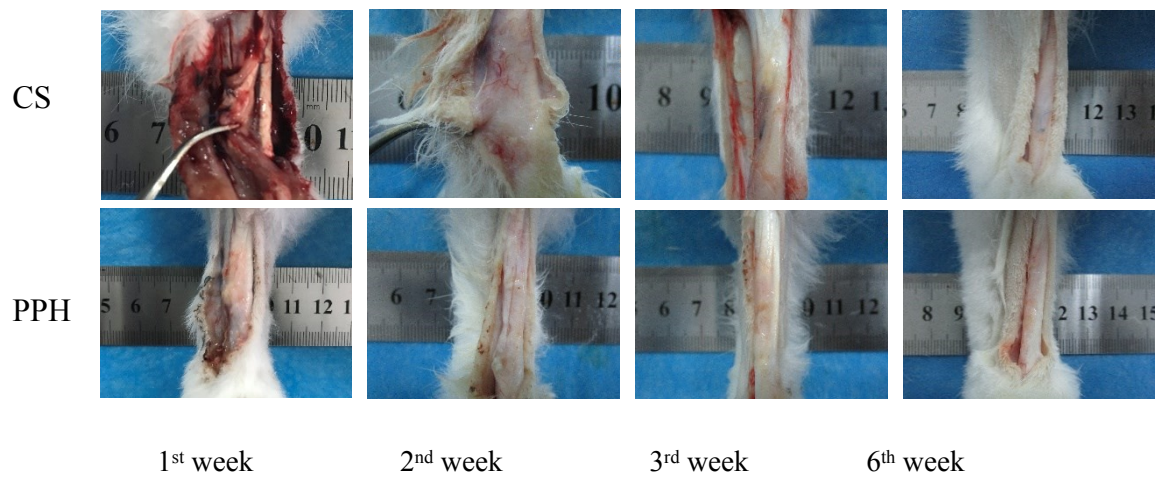

Fig. S-1 Photos of adhesion evaluation of Achilles tendon in CS group and PPH group at 1<sup>st</sup> to 6<sup>th</sup> week post operation
